# Supplementary material
Source: PubMed Central journal article supplement (PMC7605783)
Supplement: NIHMS1637053-supplement-Supplement_1.pdf [file NIHMS1637053-supplement-Supplement_1.pdf]

**Supplementary Material for: The Biochemistry of Headgroup Exchange During Triacylglycerol Synthesis in Canola**

**Shuangyi Bai, James G Wallis, Peter Denolf, Steven Engelen, Jesse D. Bengtsson<sup>1</sup>, Michel Van Thournout, Jo Dierickx, Boris Haesendonckx and John Browse**

**Table S1.** Pair-wise percent identity and similarity between BnROD1 proteins and Arabidopsis ROD1 (AtROD1).

|           | BnROD1.A3 | BnROD1.A5 | BnROD1.C3 | BnROD1.C5 | At ROD1     |
|-----------|-----------|-----------|-----------|-----------|-------------|
| BnROD1.A3 |           | 98.2      | 85.5      | 86.9      | 79.9        |
| BnROD1.A5 | 98.9      |           | 86.9      | 87.2      | 78.5        |
| BnROD1.C3 | 91.7      | 92.7      |           | 97.5      | 80.5        |
| BnROD1.C5 | 92.1      | 93.1      | 99.3      |           | 81.1        |
| At ROD1   | 88.1      | 88.1      | 88.4      | 88.1      |             |
|           |           |           |           |           |             |
|           | % Similar |           |           |           | % Identical |

**Table S2.** Pair-wise percent identity and similarity between additional proteins and Arabidopsis ROD1 (AtROD1), with notes.

|             | XP013676101 | XP013682366 | XP013714642 | XP013717241 | At ROD1     |
|-------------|-------------|-------------|-------------|-------------|-------------|
| XP013676101 |             | 97.6        | 55.7        | 55.4        | 72.9        |
| XP013682366 | 99.3        |             | 56.1        | 55.7        | 74.7        |
| XP013714642 | 70.9        | 70.6        |             | 99.6        | 56.1        |
| XP013717241 | 70.9        | 70.6        | 100         |             | 55.8        |
| At ROD1     | 84.8        | 84.9        | 70.1        | 70.1        |             |
|             |             |             |             |             |             |
|             | % Similar   |             |             |             | % Identical |

**Notes:**

1. None of the genes encoding these four *B. napus* proteins is expressed in seeds during oil synthesis.
2. The sequences XP013676101 and XP013682366 are similar to AtROD1 but both contain a H247Q substitution. This histidine is part of the active site of this class of cholinephosphotransferases in both plants (PDCT) and animals (sphingomyelin synthase) (Lu, et al., 2009).
3. Relative to the other sequences, XP013714642 and XP013717241 are shorter, with truncation of both the N-terminal (34aa) and C-terminal (11aa).

**Table S3.** Expression of four *BnROD1* genes at six time-points during seed filling in *B. napus*. Data are expressed as target reads per million reads in the database. The means and standard errors are shown for three independently grown and harvested samples.

| Gene             | 15daf | 15daf-SE | 21daf | 21daf-SE | 28daf | 28daf-SE | 32daf | 32daf-SE | 37daf | 37daf-SE | 50daf | 50daf-SE |
|------------------|-------|----------|-------|----------|-------|----------|-------|----------|-------|----------|-------|----------|
| <i>BnROD1.A3</i> | 12.26 | 1.05     | 28.07 | 6.53     | 13.23 | 0.87     | 8.42  | 0.38     | 6.90  | 3.31     | 0.00  | 0.00     |
| <i>BnROD1.C3</i> | 6.61  | 0.54     | 26.07 | 1.23     | 20.49 | 1.43     | 12.82 | 1.20     | 6.56  | 2.98     | 0.00  | 0.00     |
| <i>BnROD1.A5</i> | 2.57  | 0.19     | 0.25  | 0.05     | 0.27  | 0.11     | 0.05  | 0.05     | 0.33  | 0.01     | 0.00  | 0.00     |
| <i>BnROD1.C5</i> | 0.55  | 0.28     | 0.15  | 0.08     | 0.05  | 0.05     | 0.22  | 0.14     | 0.06  | 0.06     | 0.00  | 0.00     |

**Methods:** At three different times *B. napus* plants were grown in a growth chamber at 18°C with 16 h of light (400 µE) and a relative air humidity of 60%. From first day of flowering, flowers were tagged for the determination of seed developmental stages. At different developmental stages seed samples were collected for the three biological replicates, snap frozen, and stored at -80°C. Total mRNA from seeds of the three biological replicates were isolated according to standard methods. Gene expression was measured using transcript profiling (RNA-seq) by Illumina HiSeq paired-end sequencing (2x100 bp sequences). The counts per transcript (transcript per million; tpm) were determined as described by Li and Dewey ( Li, B. and Dewey, C. (2011). RSEM: accurate transcript quantification from RNA-Seq data with or without a reference genome. BMC Bioinformatics 12: 323).

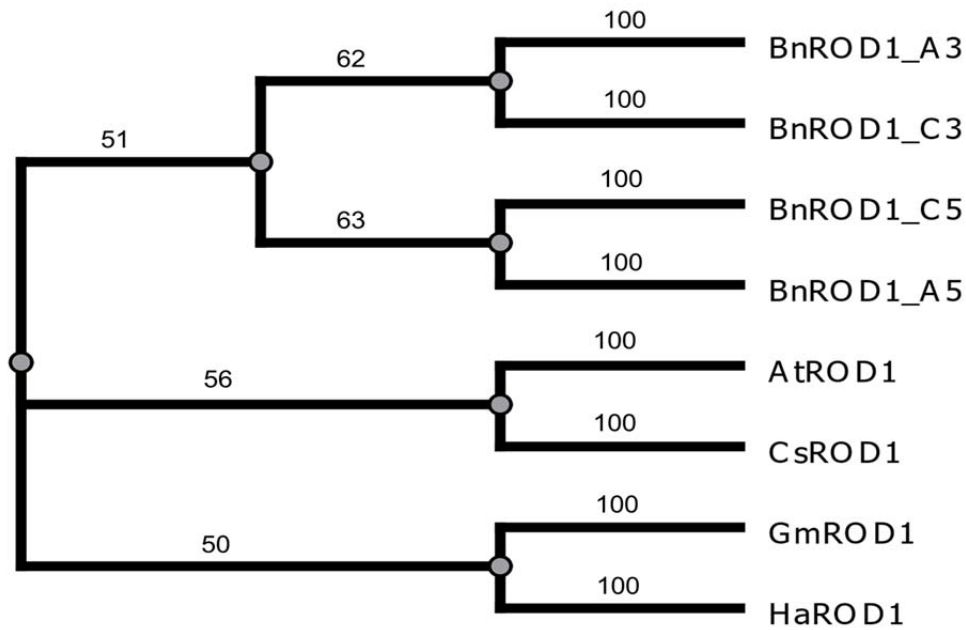

**Figure S1.** Cladogram showing the implied phylogeny of eight ROD1 proteins.

**Methods:** The protein sequence for BnROD1.A3, BnROD1.A5 BnROD1.C3 BnROD1.C5, AtROD1, CsROD1, GmROD1, and HaROD1 where aligned using the ClustalW algorithm. The alignment was used to generate a phylogenic tree with PHYLIP Neighbor Joining and a Jones-Taylor-Thornton distance matrix model calculated using Unipro UGENE bioinformatics software (Felsenstein, J. (1996). Inferring phylogenies from protein sequences by parsimony, distance, and likelihood methods. *Methods Enzymol.* 266:418-27.). Numbers indicate bootstrap values. Bn, *Brassica napus*; At, *Arabidopsis thaliana*; Cs, *Camelina sativa*; Gm, *Glycine max*; Ha, *Helianthus annuus*.

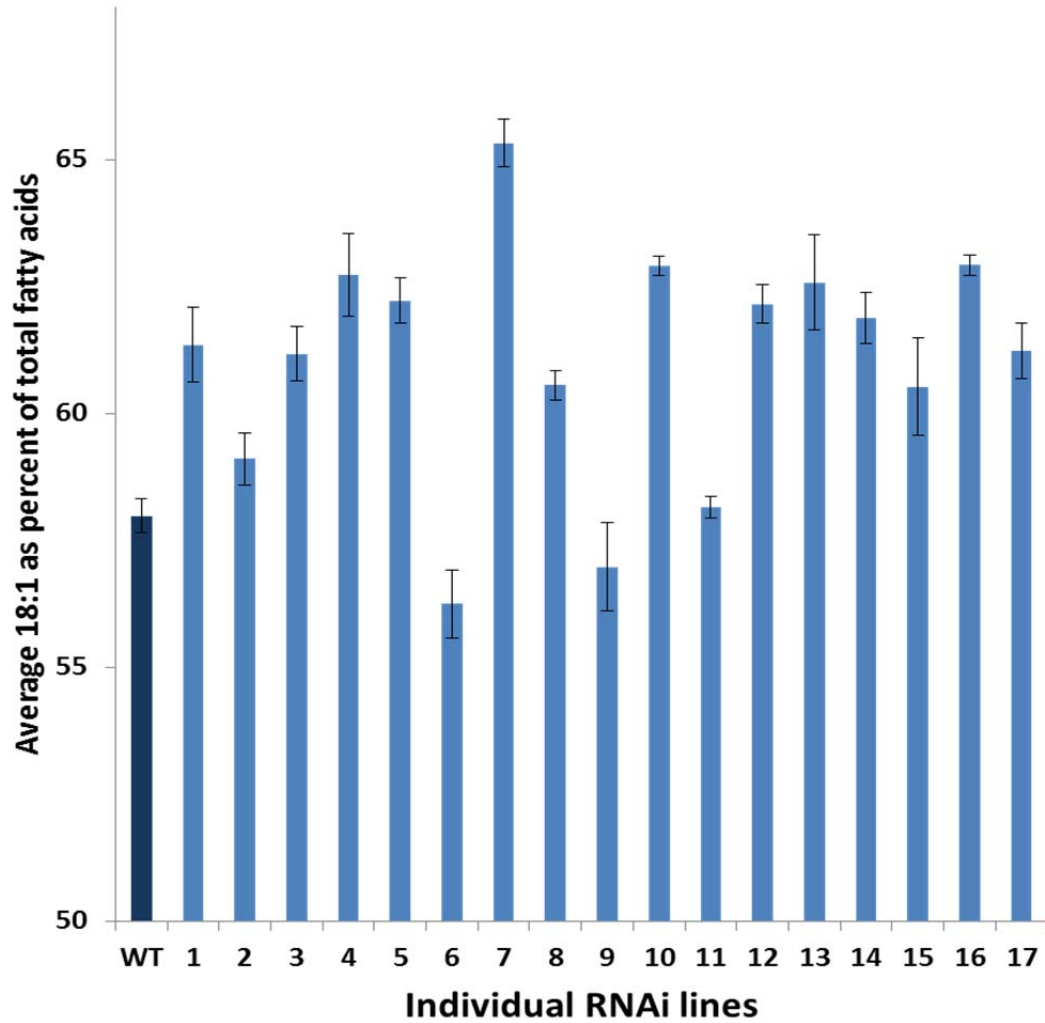

**Figure S2.** Seed 18:1 content in 17 RNAi lines. Data are for samples from bulk, segregating seed of each T1 line expressing hairpin constructs targeting the *BnROD1.A3* and *.C3* genes (lines 1-9) or the *BnROD1.A3*, *.C3*, *.A5* and *.C5* genes (lines 10-17), compared to the wild-type control. Mean  $\pm$  SE (n=5).

```

BnROD1.A3  1  ---MSTNTVVPLRRRS---NGYHTNGVAFNG-----MDNIVKKTDDCYTN
BnROD1.C3  1  ---MSTNTVVPLRRRS---NGYHTNGVAFNG-----MENIVKKTDDCYTN
AtROD1     1  MSAAAETDVSLLRRRSNSLNGNHTNGVAIDGTLDNNNRRVGDNTNTHMDISAKKTDNGYAN

BnROD1.A3  40  GNGNGGVERSKASFLTWTMRDAVYVARYHWI PCFFAVGVLF FFMGVEYTLQMVPAKSEPF
BnROD1.C3  40  GNGVGG--KSKASFLTWTMRDAVYVARYHWI PCFFAVGVLF FFMGVEYTLQMVPAKSEPF
AtROD1     61  GVGGGGW-RSKASFTTWTARDIVYVRYHWI PCMFAAGLL FFMGVEYTLQMI PARSEPF

BnROD1.A3  100 IGFVATRSLNRVLASSPDLNTLLAALNTVFVAMQTTYIVWTLMEGRPRATISACFMFTC
BnROD1.C3  98  IGFVATRSLNRVLASSPDLNTLLAALNTVFVAMQTYIVWTLMEGRPRATISACFMFTC
AtROD1     120 LGFVVTRSLNRVLASSPDLNTVLAALNTVFVGMQTTYIVWTLVEGRARATIAALFMFTC

BnROD1.A3  160  RGILGYSTQLPLPQDFLGSGVDFPVGNVSFFLFYSGHVAGSMIASLDMRRMQRLRLAMLF
BnROD1.C3  158  RGILGYSTQLPLPQDFLGSGVDFPVGNVSFFLFYSGHVAGSMIASLDMRRMQRLRLAMLF
AtROD1     180  RGILGYSTQLPLPQDFLGSGVDFPVGNVSFFLFYSGHVAGSMIASLDMRRMQRLRLAMVF

BnROD1.A3  220  DILNILQSIRLLGTRGHYTIDLAVGVGAGILFDSLAGKYEEMMSKRHNLANGFSLISKDS
BnROD1.C3  218  DILNILQSIRLLGTRGHYTIDLAVGVGAGILFDSLAGKYEEMMSKRHNLANGFSLISKDS
AtROD1     240  DILNVLQSIRLLGTRGHYTIDLAVGVGAGILFDSLAGKYEEMMSKRH-LGTGFSLISKDS

BnROD1.A3  280  LVN
BnROD1.C3  278  LVN
AtROD1     299  LVN

```

**Figure S3.** Protein sequence alignment of PDCT enzymes from *B. napus* (BnROD1.A3 and BnROD1.C3) and Arabidopsis (AtROD1). Residues contributing to the active site are shown in blue. Six putative transmembrane sequences are underlined in green. Sites of the mutations included in Figure 7 are highlighted in red.
